# Supplementary material for: Computational Insights into the Unfolding of a Destabilized Superoxide Dismutase 1 Mutant
Source: Biology (Basel). 2021 Nov 27;10(12):1240. doi: 10.3390/biology10121240 (PMC8698278; doi:10.3390/biology10121240)
Supplement: Supplementary file 1 [file biology-10-01240-s001.zip › biology-1448109-supplementary.pdf]

# Supplementary Information to: Computational Insights into the Unfolding of a Destabilized Superoxide Dismutase 1 Mutant

Stepan Timr<sup>1,2,3,\*</sup>, Fabio Sterpone<sup>1,2,\*</sup>,

<sup>1</sup>Laboratoire de Biochimie Théorique (UPR 9080), CNRS, Université de Paris

<sup>2</sup>Institut de Biologie Physico-Chimique, Fondation Edmond de Rothschild,  
PSL Research University

<sup>3</sup>J. Heyrovsky Institute of Physical Chemistry, Czech Academy of Sciences

\*Correspondence: [stepan.timr@jh-inst.cas.cz](mailto:stepan.timr@jh-inst.cas.cz), [fabio.sterpone@ibpc.fr](mailto:fabio.sterpone@ibpc.fr)

## Supplementary Methods

### Definition of the native contact fraction

A pair  $(i, j)$  of SOD1<sub>bar</sub> C $\alpha$  carbon atoms  $i$  and  $j$  separated by at least three amino acid residues in the peptide sequence was considered a native contact if positioned at a distance  $d_{ij}^{\text{ref}}$  lower than 10 Å in the crystal structure. The fraction of native contacts for a given SOD1<sub>bar</sub> conformation was then calculated as

$$Q_N = \frac{1}{N_{\text{ref}}} \sum_{(i,j)} \exp \left[ -0.5 \left( \max(0, d_{ij} - d_{ij}^{\text{ref}}) \right)^2 \right] \quad (1)$$

where the sum runs over all the native contacts in the crystal structure,  $N_{\text{ref}}$  is the number of these native contacts, and  $d_{ij}$  is the distance of the atom pair in the given conformation.

## Obtaining a stability curve from a two-state model

As the CHARMM36m REST2 simulations exhibited two relatively well-separated populations of folded and unfolded states (see Figures S4–S5), it was possible to set a threshold value  $Q_N = 0.4$  separating native-like conformations from denaturated ones in order to calculate the temperature-dependent fraction  $r(T)$  of folded states. The free energy of unfolding, that is, the difference in the free energies of the folded- and unfolded states in the two-state model, equaled:

$$\Delta G_u(T) = k_B T \ln \frac{r(T)}{1 - r(T)} \quad (2)$$

The  $\Delta G_u(T)$  was fit with the modified Gibbs-Helmholtz equation:

$$\Delta G_u(T) = -\Delta C_p \left[ T \left( \ln \left( \frac{T}{T_m} \right) - 1 \right) + T_m \right] + \Delta H_m \left( 1 - \frac{T}{T_m} \right) \quad (3)$$

where  $T_m$  stands for the melting temperature,  $\Delta H_m$  expresses the melting enthalpy, and  $\Delta C_p$  is the specific heat of unfolding. Given a limited statistics in regions where  $r$  closely approached 1 or 0, we only included such temperatures in the fit for which  $r(T) < 0.99$  and  $r(T) > 0.01$ .

## Supplementary Figures

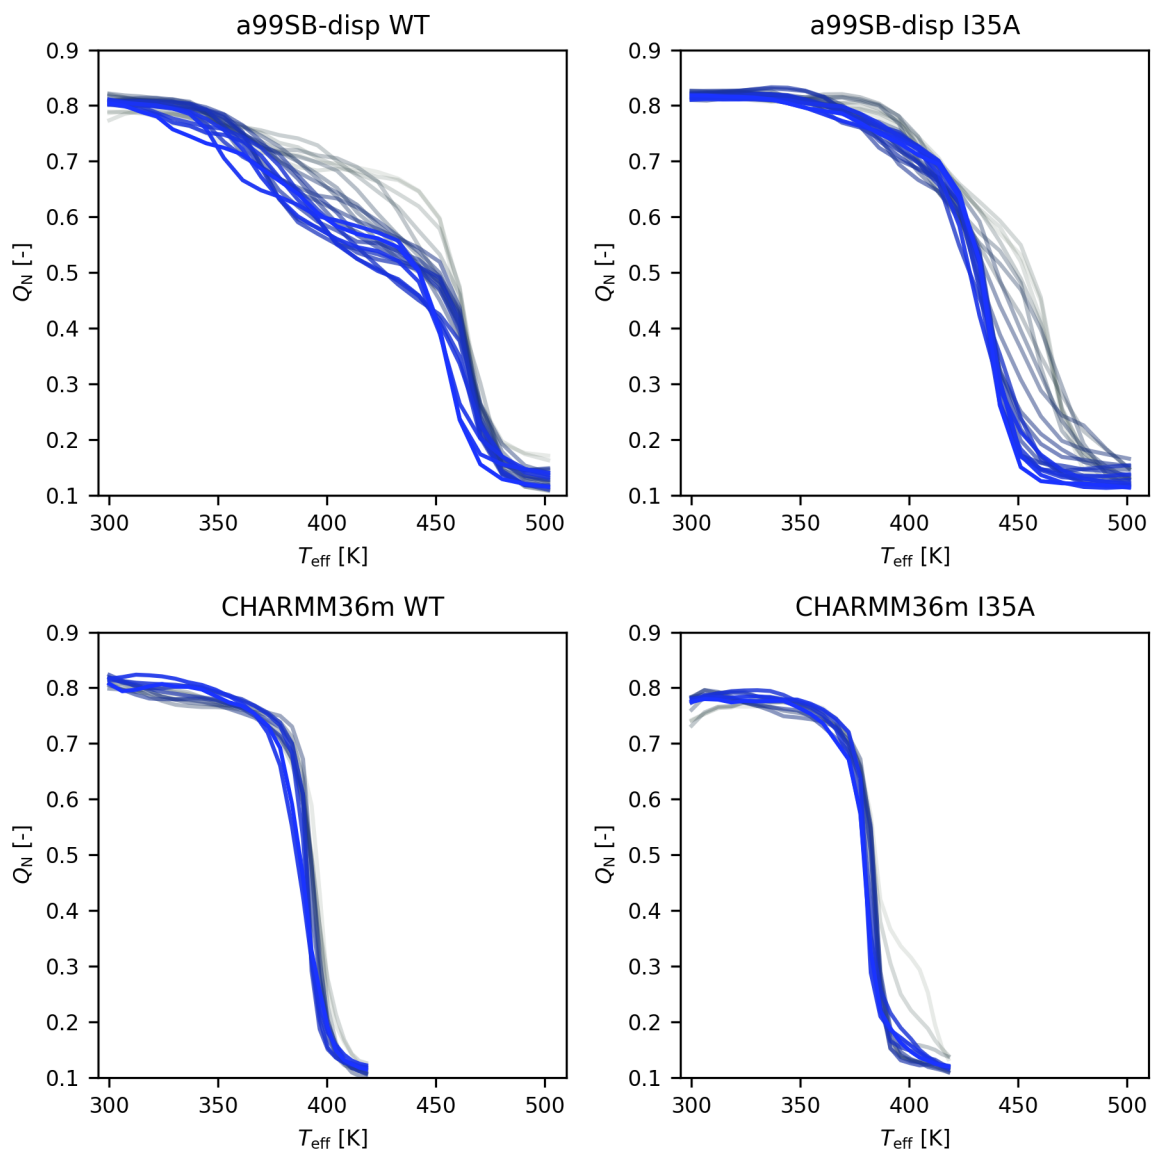

Figure S1: Convergence of the fraction  $Q_N$  of  $\text{SOD1}_{\text{bar}}^{\text{WT}}$  and  $\text{SOD1}_{\text{bar}}^{\text{I35A}}$  native contacts in REST2 simulations. The individual curves were obtained from 50 ns blocks spanning (light gray to blue) the 400–1500 ns interval for a99SB-disp and the 400–1000 ns interval for CHARMM36m.

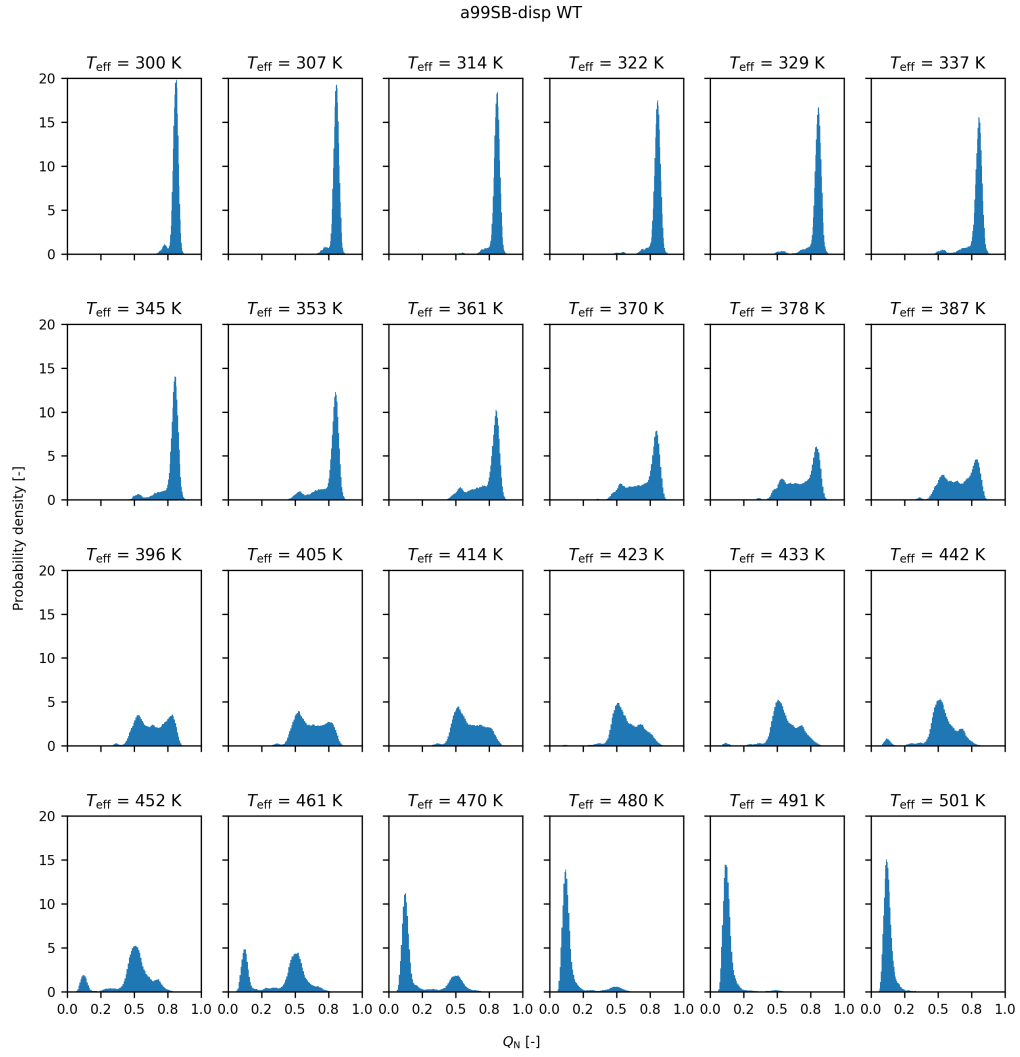

Figure S2: Temperature-dependent distributions of the fraction  $Q_N$  of  $\text{SOD1}_{\text{bar}}^{\text{WT}}$  native contacts sampled with a99SB-disp.

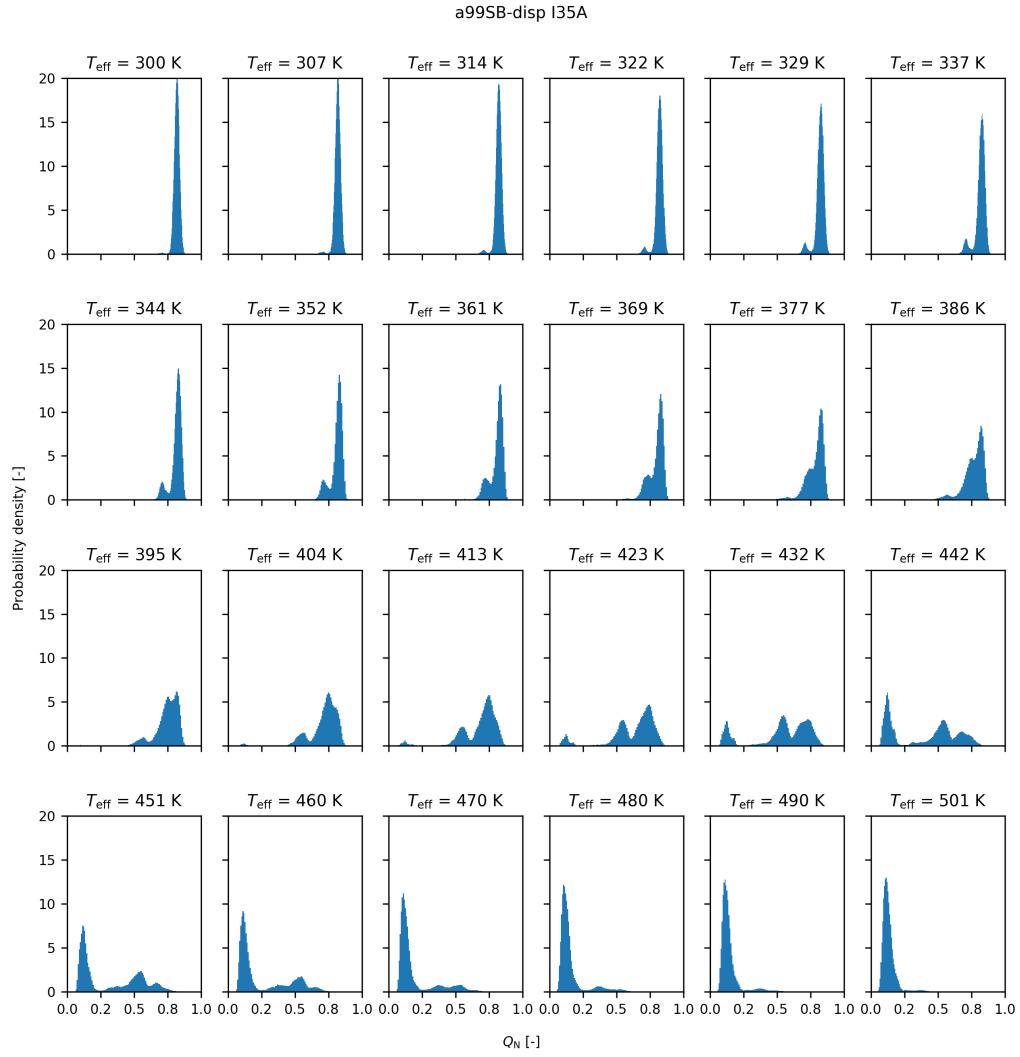

Figure S3: Temperature-dependent distributions of the fraction  $Q_N$  of SOD1<sup>I35A</sup><sub>bar</sub> native contacts sampled with a99SB-disp.

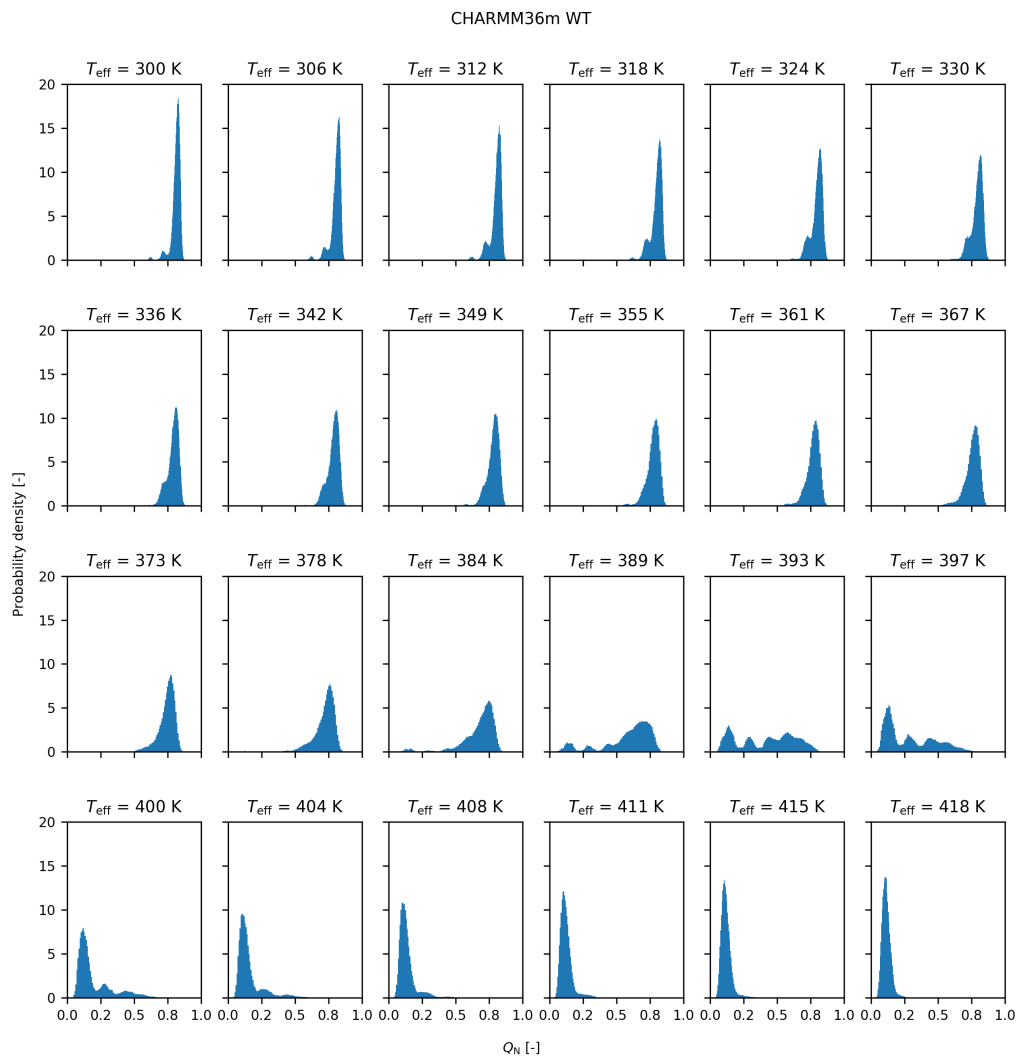

Figure S4: Temperature-dependent distributions of the fraction  $Q_N$  of SOD1<sup>WT</sup><sub>bar</sub> native contacts sampled with CHARMM36m.

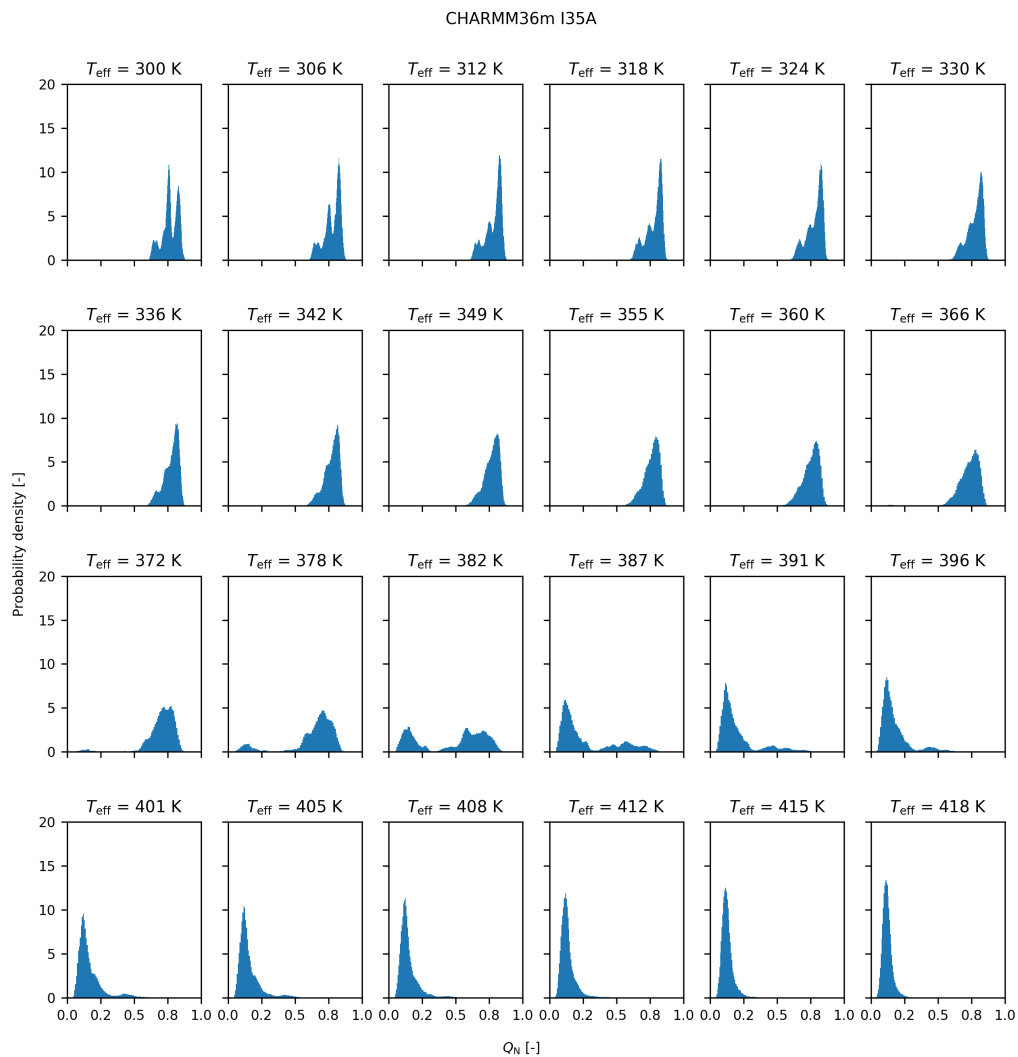

Figure S5: Temperature-dependent distributions of the fraction  $Q_N$  of SOD1<sub>bar</sub><sup>I35A</sup> native contacts sampled with CHARMM36m.

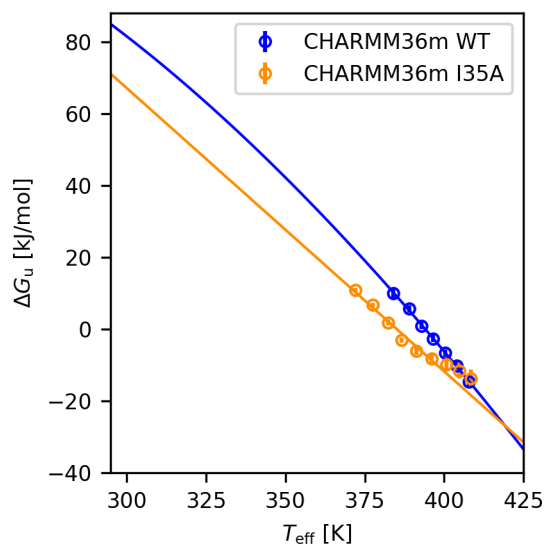

Figure S6: Stability curves obtained from a two-state model for the CHARM36m REST2 simulations. The lines represent fits using the modified Gibbs-Helmholtz equation (see Supplementary Methods for details).

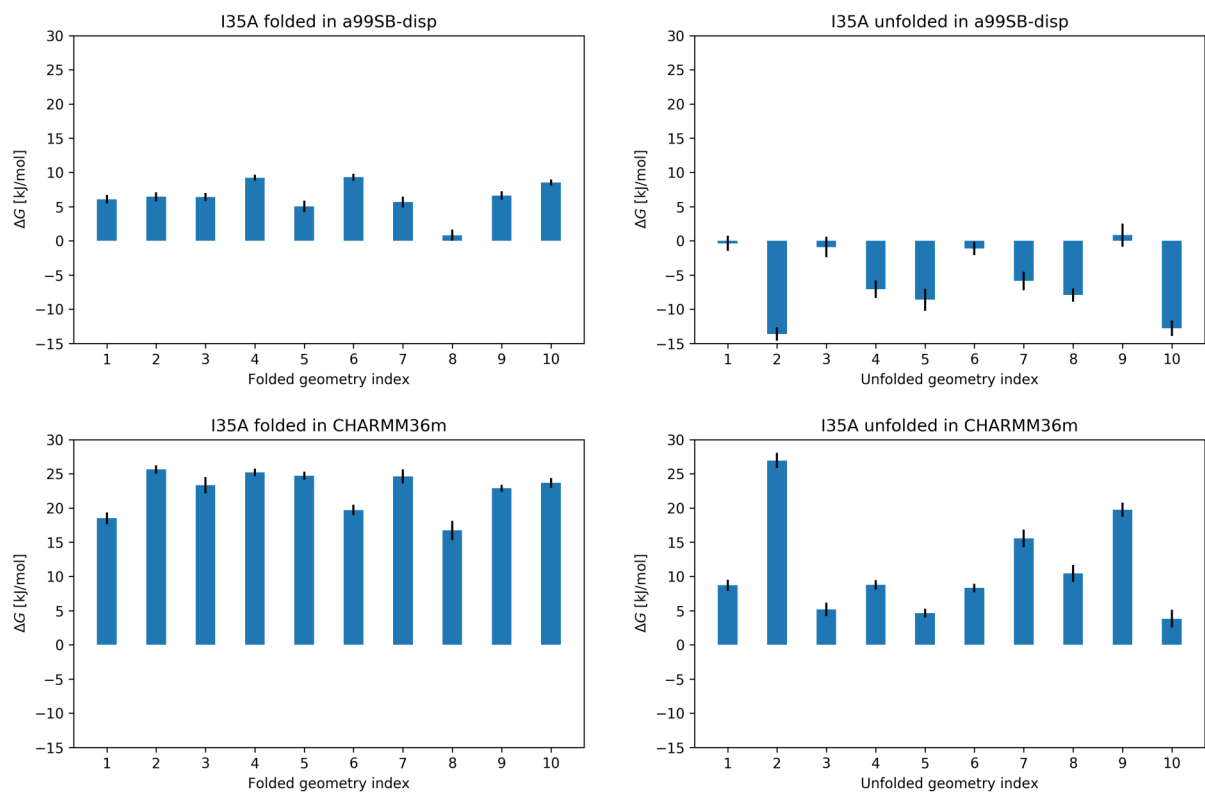

Figure S7: Free-energy difference arising from the alchemical transformation of isoleucine 35 to alanine for individual geometries extracted from the SOD1<sub>bar</sub><sup>WT</sup> REST2 simulations.

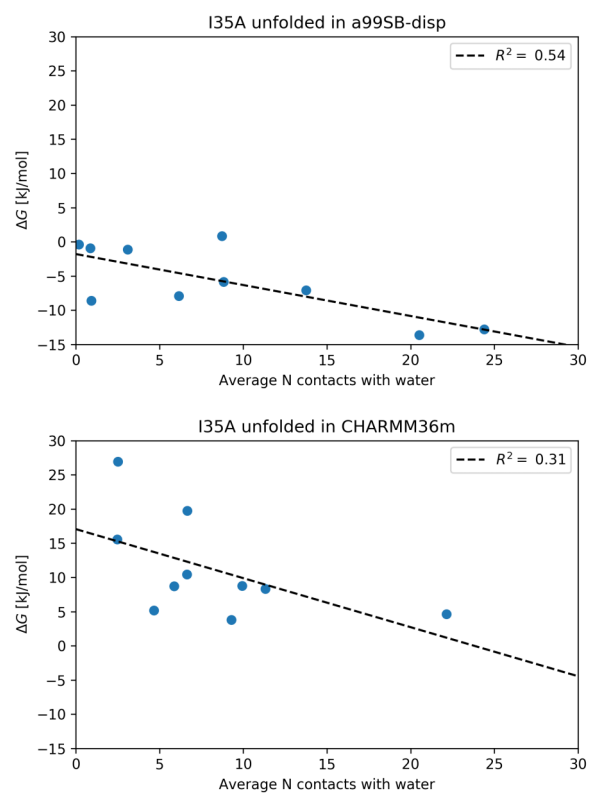

Figure S8: Correlation between the number of water contacts of the I35 side chain and the free-energy differences arising from the I35A alchemical transformation for individual unfolded geometries.

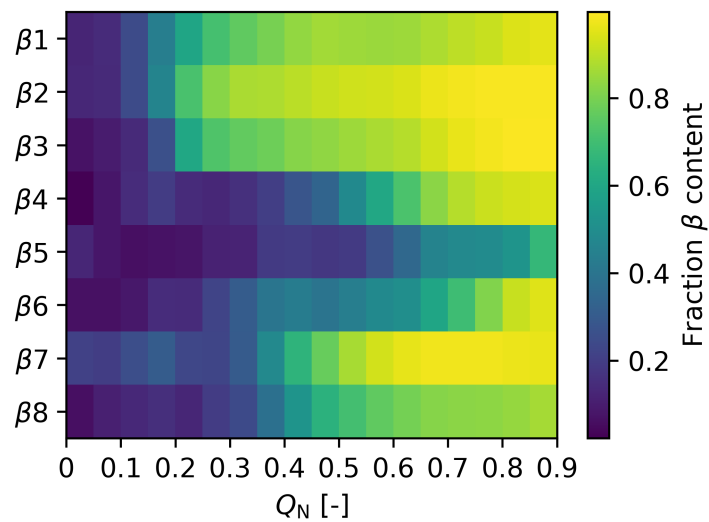

Figure S9: Overall histogram of the  $\beta$ -sheet secondary-structure content in individual  $\beta$ -strands of SOD1<sub>bar</sub><sup>WT</sup> as a function of the native contact fraction  $Q_N$  and obtained with the CHARMM36m force field. The values are normalized with respect to the crystal structure.

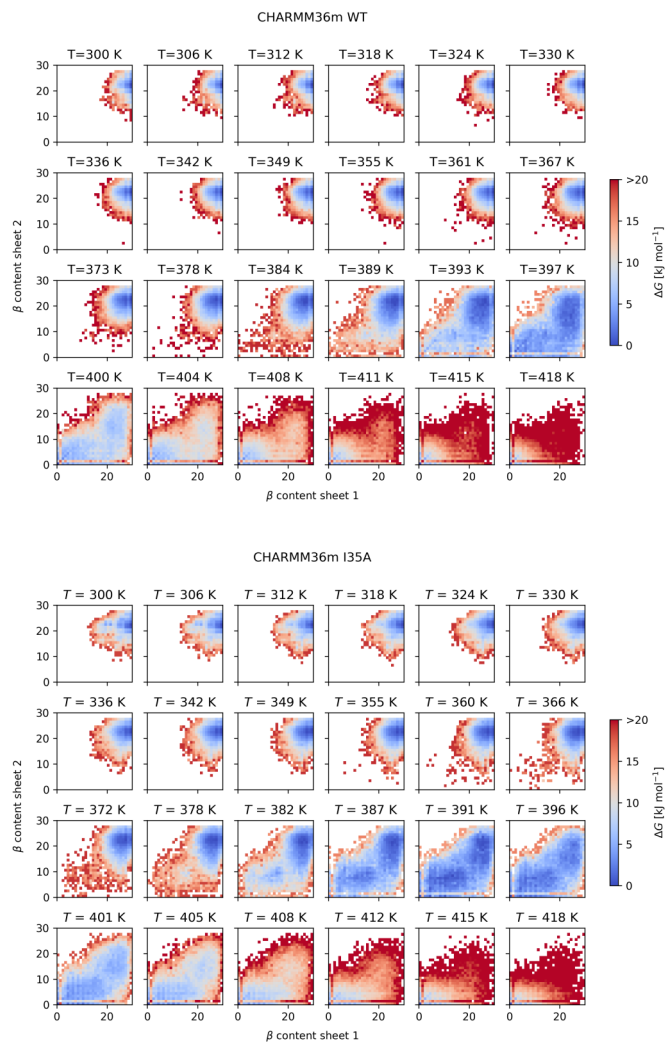

Figure S10: Free-energy landscapes of SOD1<sup>WT</sup><sub>bar</sub> unfolding at different temperatures of the CHARMM36m REST2 simulation. The two collective variables correspond to the number of residues with the  $\beta$ -sheet secondary structure in the  $\beta$ -sheet 1 (formed by the  $\beta$ -strands  $\beta_1$ ,  $\beta_2$ ,  $\beta_3$ , and  $\beta_6$ ) and the  $\beta$ -sheet 2 ( $\beta_4$ ,  $\beta_5$ ,  $\beta_7$ , and  $\beta_8$ ).

## Supplementary Tables

| Step | Length [ns] | $\Delta t$ [fs] | Restraints  | $k_{\text{BB}}$ [kJ mol <sup>-1</sup> nm <sup>-2</sup> ] | $k_{\text{SC}}$ [kJ mol <sup>-1</sup> nm <sup>-2</sup> ] |
|------|-------------|-----------------|-------------|----------------------------------------------------------|----------------------------------------------------------|
| 1    | 0.1         | 1               | heavy atoms | 1000                                                     | 500                                                      |
| 2    | 0.1         | 1               | heavy atoms | 500                                                      | 250                                                      |
| 3    | 0.1         | 1               | heavy atoms | 250                                                      | 100                                                      |
| 4    | 0.5         | 2               | heavy atoms | 100                                                      | 50                                                       |
| 5    | 0.5         | 2               | heavy atoms | 50                                                       | 0                                                        |
| 6    | 0.5         | 2               | none        | 0                                                        | 0                                                        |

Table S1: Relaxation protocol used to obtain the initial protein geometry.  $k_{\text{BB}}$  and  $k_{\text{SC}}$  – force constants of harmonic restraint potentials applied to the heavy atoms of the backbone and the side chains, respectively.  $\Delta t$  – time step.

|          |     |          |     |
|----------|-----|----------|-----|
| $T_0$    | 300 | $T_{12}$ | 465 |
| $T_1$    | 311 | $T_{13}$ | 482 |
| $T_2$    | 323 | $T_{14}$ | 500 |
| $T_3$    | 335 | $T_{15}$ | 519 |
| $T_4$    | 347 | $T_{16}$ | 538 |
| $T_5$    | 360 | $T_{17}$ | 558 |
| $T_6$    | 373 | $T_{18}$ | 579 |
| $T_8$    | 387 | $T_{19}$ | 600 |
| $T_8$    | 402 | $T_{20}$ | 623 |
| $T_9$    | 417 | $T_{21}$ | 647 |
| $T_{10}$ | 432 | $T_{22}$ | 672 |
| $T_{11}$ | 448 | $T_{23}$ | 698 |

Table S2: Solute temperatures [K] used in the REST2 simulations.
